# Supplementary material for: Mechanistic insight into how multidrug resistant Acinetobacter baumannii response regulator AdeR recognizes an intercistronic region
Source: PubMed Central journal article supplement — Nucleic Acids Res. 2017 Jul 17;45(16):9773–87. doi: 10.1093/nar/gkx624 (PMC5766154; doi:10.1093/nar/gkx624), 2017-07-17
Supplement: gkx624_supp.pdf [file gkx624_supp.pdf]

**Supplementary Figure S1.** A Crystal packing of the AdeR in complex with intercistronic region DNA fragments. 4 asymmetry units were generated and colored related to the DNA molecules in red, green, blue and yellow respectively. In one asymmetry unit, there are 6 AdeR\_DBD monomers with 4 of them binding to two DNA molecules, the 5<sup>th</sup> AdeR\_DBD monomer (cyan) were trapped between two DNA molecules. The 6<sup>th</sup> monomer (grey) has barely interaction with the DNA. B. Alignment of the DNA bound and DNA unbound AdeR\_DBD indicated that conformation change of  $\beta 5$ & $\beta 6$  hairpin to adapted into the DNA minor groove and more residues were traced of the flexible loop (green) linked with  $\alpha 3$  resulted from DNA binding.

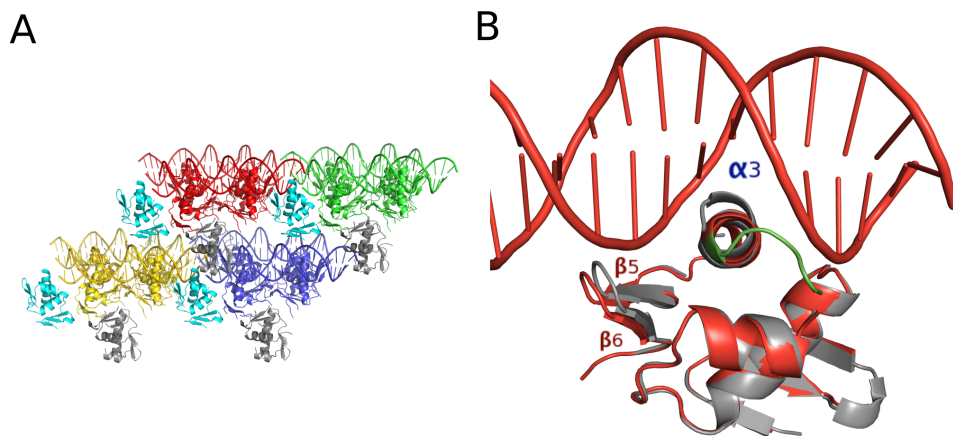

**Supplementary Figure S2.** A. EMSA experiments cross-validated the isothermal titration calorimetry that the R231A abolished the interaction between AdeR and intercistronic region DNA. B. Isothermal titration calorimetry revealed the R205A/R215A double mutation could diminish the AdeR binding to the intercistronic region DNA.

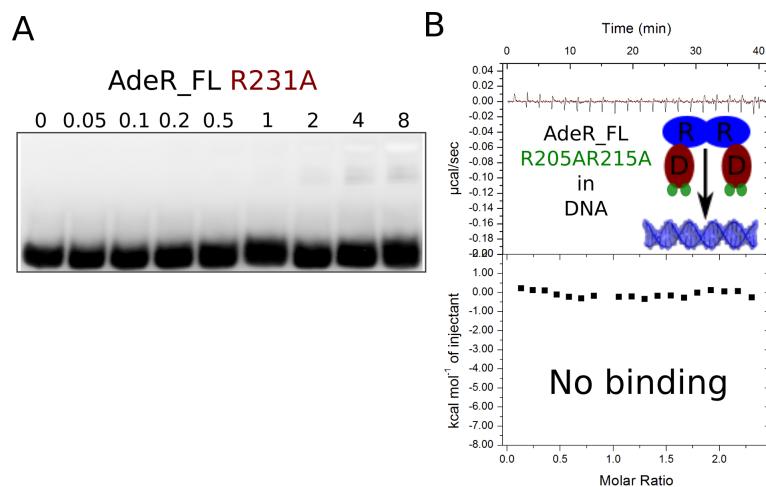

**Supplementary Table S1.** Primers used in the cloning PCR and site directed mutagenesis

| Primer name                      | Sequence (5' to 3')                                               |
|----------------------------------|-------------------------------------------------------------------|
| <b>Cloning PCR</b>               |                                                                   |
| AdeRFL-F                         | 5' CATGCCATGGGCCATCATCATCATCACCTTTGATCATTCTTTTTCTTTTG 3'          |
| AdeRFL-R                         | 5' GGAATTCTTATTTAGGCATCATCTTTTAC 3'                               |
| AdeRRD-R                         | 5' GGAATTCTTATGCTTTGTTTGCAAAGTGA 3'                               |
| AdeRDBD- F                       | 5' CATGCCATGGGCCATCATCATCATCACACTAATAAAAAATAAAGTCTATAAAAAATATT 3' |
| <b>Site Directed Mutagenesis</b> |                                                                   |
| D108A-F                          | 5' CGCATAGGTGCAGATGCGTTTGTGGTGAAGCCTTTTAACCCAAATG 3'              |
| D108A-R                          | 5' GGCTTCACCACAAACGCATCTGCACCTATGCGTAATGCCATAAC 3'                |
| F109A-F                          | 5' CATAGGTGCAGATGACGCGGTGGTGAAGCCTTTTAACCCAAATG 3'                |
| F109A-R                          | 5' GTTAAAAGGCTTCACCACGCGTCATCTGCACCTATGCGTAATGCC 3'               |
| R122A-F                          | 5' CAAATGAAGTCATCGCTGCGGTTCCAGGCAGTCTTAAGACGTAATC 3'              |
| R122A-R                          | 5' CTTAAGACTGCCTGAACCGCAGCGATGACTTCATTTGGGTTAAAAG 3'              |
| R205A-F                          | 5' GATAGCGATGCACTAGAGGCGACCGTAGATAGCCATGTAAGTAAGC 3'              |
| R205A-R                          | 5' CATGGCTATCTACGGTCGCCTCTAGTGCATCGCTATCATTATGC 3'                |
| R215A-F                          | 5' CATGTAAGTAAGCTGGCGAAAAAACTAGAAGAACAAGGCATATTTTC 3'             |
| R215A-R                          | 5' GTTCTTCTAGTTTTTTCGCCAGCTTACTTACATGGCTATCTACGG 3'               |
| R231A-F                          | 5' CAAATGTTAATTAATGTGGCGGGCGTGGGATATAGGCTAGATAATC 3'              |
| R231A-R                          | 5' GCCTATATCCCACGCCCGCCACATTAATTAACATTTGAAATATG 3'                |

**Supplementary Table S2.** SAXS data collection and analysis statistics.

| AdeR Samples                                  | DBD                    | RD              | FL              | DBD<br>DNA              | FL<br>DNA               |
|-----------------------------------------------|------------------------|-----------------|-----------------|-------------------------|-------------------------|
| Data Collection Parameters                    |                        |                 |                 |                         |                         |
| Beamline                                      | BL19U2, SSRF, Shanghai |                 |                 |                         |                         |
| Beam size                                     | 0.33mm×0.55mm          |                 |                 |                         |                         |
| Detector                                      | Pilatus 1M             |                 |                 |                         |                         |
| $q$ range ( $\text{\AA}^{-1}$ )               | 0.04-4.5               |                 |                 |                         |                         |
| Temperature                                   | 293K                   |                 |                 |                         |                         |
| Concentration                                 | 1-6 mg/ml              | 1-7<br>mg/ml    | 1-5<br>mg/ml    | 15-120<br>$\mu\text{M}$ | 20-160<br>$\mu\text{M}$ |
| Structural Parameters                         |                        |                 |                 |                         |                         |
| $I(0)$ ( $\text{\AA}^{-1}$ )                  | 72.31                  | 98.74           | 248.60          | 595.70                  | 321.80                  |
| $R_g$ ( $\text{\AA}$ )                        | 17.43                  | 22.04           | 30.04           | 24.25                   | 33.30                   |
| $D_{\text{max}}$ ( $\text{\AA}$ )             | 49                     | 66              | 87              | 77                      | 102                     |
| Porod<br>estimate<br>$V_p$ ( $\text{\AA}^3$ ) | 22630                  | 46558           | 85989           | 43782                   | 99041                   |
| Molecular Weight Determination                |                        |                 |                 |                         |                         |
| Molecular mass<br>(kDa)                       | 13.915<br>Monomer      | 32.724<br>Dimer | 58.551<br>Dimer | 43.308<br>2M: DNA       | 74.030<br>D: DNA        |
| SAXS MoW2 (kDa)                               | 14.559                 | 37.737          | 66.959          | 34.602                  | 73.274                  |
| Superdex75 SEC<br>(kDa)                       | 14.727                 | 25.813          | 50.464          | 42.195                  | 60.906                  |
